# Supplementary material for: Amino acid variants of SARS-CoV-2 papain-like protease have impact on drug binding
Source: PubMed Central journal article supplement (PMC9721480; doi:10.1371/journal.pcbi.1010667), 2022-11-21

C-alpha RMSD (Å)

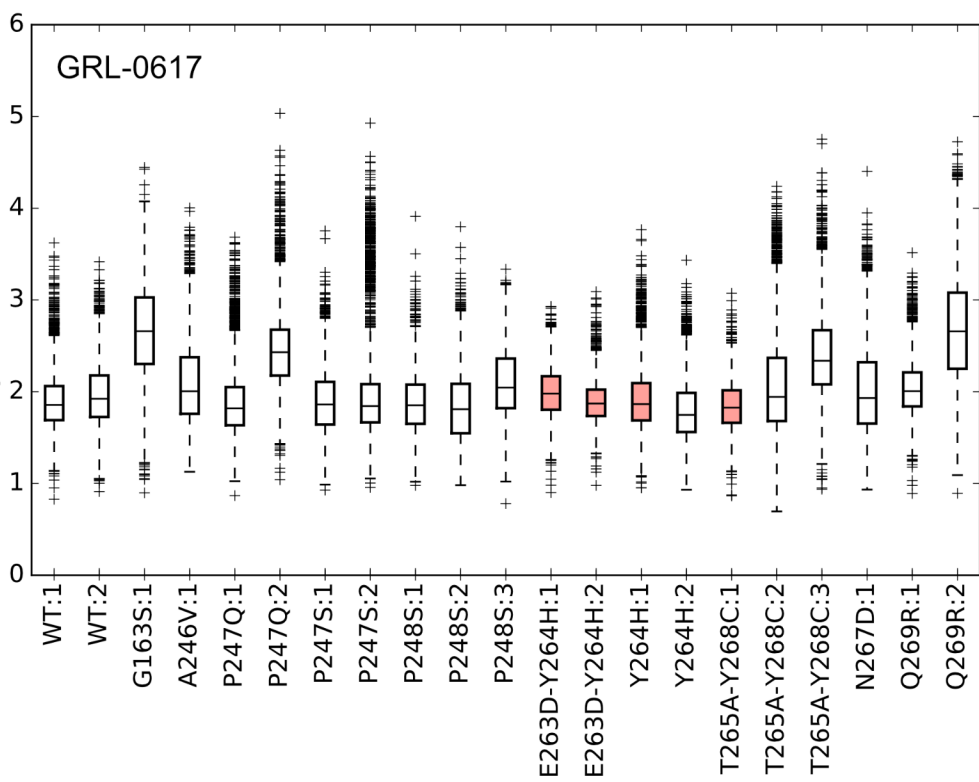

C-alpha RMSD (Å)

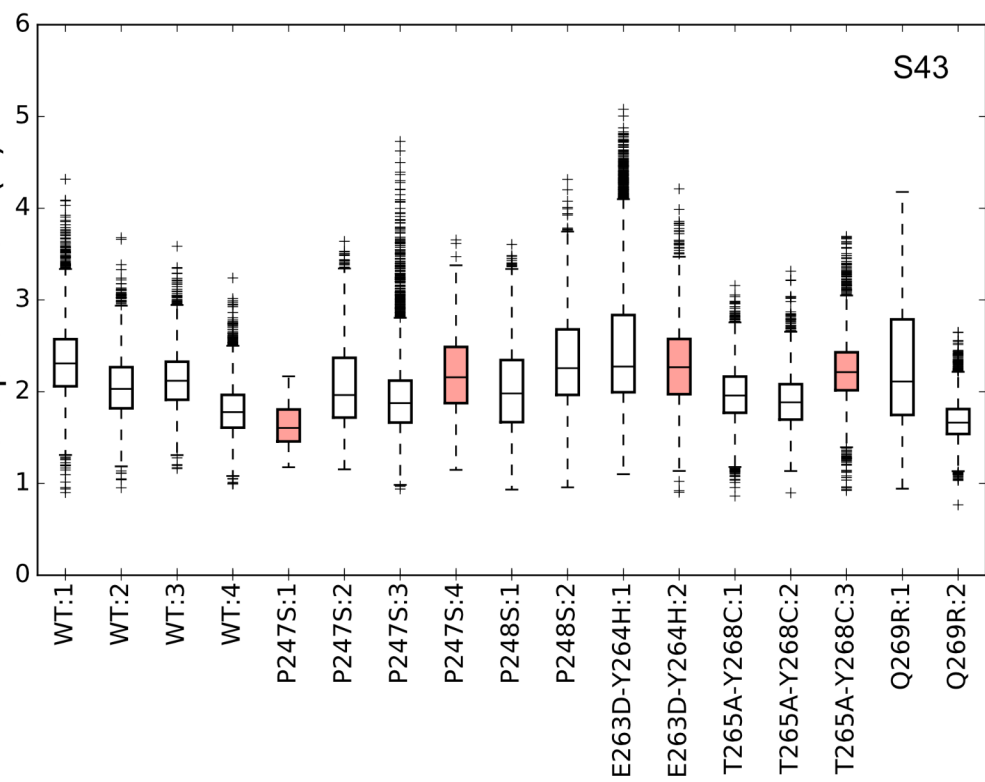

Supplement: pcbi.1010667.s003.pdf [file pcbi.1010667.s003.pdf]
