# Supplementary material for: Amino acid variants of SARS-CoV-2 papain-like protease have impact on drug binding
Source: PubMed Central journal article supplement (PMC9721480; doi:10.1371/journal.pcbi.1010667), 2022-11-21
Supplement: pcbi.1010667.s008.pdf [file pcbi.1010667.s008.pdf]

**S1 Table: Length of the PLpro-inhibitor trajectories (in ns) analyzed in this study.** The bolded entries with asterisk indicate the trajectories in which the ligand dissociated from the binding site. For analysis, only the frames with ligand present in the binding site were used.

| Variant (trajectory) | GRL-0617    | S43         |
|----------------------|-------------|-------------|
| WT:1                 | 500         | 500         |
| WT:2                 | 500         | 500         |
| WT:3                 | -           | 500         |
| WT:4                 | -           | 500         |
| G163S:1              | 500         | -           |
| A246V:1              | 500         | -           |
| P247Q:1              | 500         | -           |
| P247Q:2              | 500         | -           |
| P247S:1              | 500         | <b>5.5*</b> |
| P247S:2              | 500         | 500         |
| P247S:3              | -           | 500         |
| P247S:4              | -           | <b>44*</b>  |
| P248S:1              | 407         | 500         |
| P248S:2              | 500         | 500         |
| P248S:3              | 500         | -           |
| E263D-Y264H:1        | <b>194*</b> | 500         |
| E263D-Y264H:2        | <b>370*</b> | <b>415*</b> |
| Y264H:1*             | <b>330*</b> | -           |
| Y264H:2              | 500         | -           |
| N267D:1              | 500         | -           |
| T265A-Y268C:1        | <b>201*</b> | 500         |
| T265A-Y268C:2        | 500         | 500         |
| T265A-Y268C:3        | 500         | <b>426*</b> |
| Q269R:1              | 500         | 500         |
| Q269R:2              | 500         | 500         |
