# Supplementary material for: Amino acid variants of SARS-CoV-2 papain-like protease have impact on drug binding
Source: PubMed Central journal article supplement (PMC9721480; doi:10.1371/journal.pcbi.1010667), 2022-11-21
Supplement: pcbi.1010667.s009.pdf [file pcbi.1010667.s009.pdf]

**S2 Table: Hydrophobic interactions between S43 ligand rings and protein amino acids.** Crystal – data for PDB ID: 7d7t with information on distance between rings. For trajectories – percentage of trajectory in which interaction occurs (i.e.  $D < 5\text{\AA}$ ; based on frames every 100ps). Trajectories in which the ligand dissociated from the protein are indicated with \*. A1, A2 – naphthyl group; B – piperidine; C – benzene.

| Crystal            | A1-<br>-P247 | A1-<br>-P248 | A1-<br>-Y264 | A1-<br>-Y268 | A2-<br>-P247 | A2-<br>-P248 | A2-<br>-Y264 | A2-<br>-Y268 | B-<br>-Y264 | B-<br>-Y268 | C-<br>-K157 | C-<br>-Y268 | C-<br>-Q269 |
|--------------------|--------------|--------------|--------------|--------------|--------------|--------------|--------------|--------------|-------------|-------------|-------------|-------------|-------------|
| Crystal            | -            | 4.8Å         | -            | 4.8Å         | 4.7Å         | 4.8Å         | -            | -            | -           | 4.5Å        | -           | -           | -           |
| WT:1               | 0.2          | 68.7         | 0            | 24.2         | 17.3         | 81.3         | 0            | 13.8         | 69.6        | 40.5        | 0.6         | 1.4         | -           |
| WT:2               | 0.1          | 74           | 0            | 24.9         | 24.7         | 82.3         | 0            | 18           | 59.3        | 53.7        | 1.5         | 1.5         | -           |
| WT:3               | 0.2          | 75.2         | 0            | 26.9         | 22.6         | 82           | 0            | 18.5         | 60.2        | 52.5        | 0.6         | 1.8         | -           |
| WT:4               | 0.3          | 77.4         | 0            | 22.8         | 30           | 73.2         | 0            | 18.1         | 56.9        | 48.5        | 0.8         | 2           | -           |
| E263D-<br>Y264H:1  | 0.4          | 52.8         | 4.3          | 21.5         | 7.3          | 84.7         | 0            | 19.2         | 10.4        | 34.6        | 19.6        | 1.4         | -           |
| E263D-<br>Y264H:2* | 0.2          | 60.7         | 5.5          | 22.1         | 9.9          | 85.3         | 0            | 19.2         | 12.4        | 29.5        | 38.2        | 0.6         | -           |
| T265A-<br>Y268C:1  | 0.4          | 49.5         | 0.2          | 37.6         | 4.4          | 34.8         | 0            | 18           | 36.9        | 7.1         | 1.4         | 0.9         | -           |
| T265A-<br>Y268C:2  | 2.5          | 63           | 0            | 42.9         | 42           | 73.3         | 0            | 11.4         | 32.3        | 14.7        | 48.3        | 0.6         | -           |
| T265A-<br>Y268C:3* | 0.2          | 63.8         | 0.4          | 48.4         | 6.8          | 58.3         | 0            | 17           | 48.8        | 12          | 2.2         | 2           | -           |
| P247S:1*           | -            | 85.7         | 0            | 7.1          | -            | 67.9         | 0            | 28.6         | 60.7        | 19.6        | 0           | 8.9         | -           |
| P247S:2            | -            | 66.9         | 0            | 24           | -            | 70           | 0            | 12.6         | 53          | 38.2        | 5.8         | 1.4         | -           |
| P247S:3            | -            | 75.4         | 0            | 25.1         | -            | 78.7         | 0            | 12.6         | 48.1        | 41.9        | 11.3        | 1.6         | -           |
| P247S:4*           | -            | 64.4         | 0            | 4.5          | -            | 68.9         | 0            | 3.6          | 46.2        | 7.5         | 4.3         | 5.7         | -           |
| P248S:1            | 0.9          | -            | 0.2          | 17.3         | 14.2         | -            | 0            | 22.7         | 63.4        | 36.5        | 2.7         | 1.4         | -           |
| P248S:2            | 0.4          | -            | 2.5          | 12.9         | 2.6          | -            | 0.3          | 16.2         | 57          | 27.1        | 6.6         | 1.5         | -           |
| Q269R:1            | 0            | 64           | 0            | 21.2         | 12.9         | 74.6         | 0            | 10.5         | 66.4        | 33          | 1.3         | 0.6         | 42.4        |
| Q269R:2            | 0.1          | 68.7         | 0            | 25.9         | 25           | 81.9         | 0            | 13.4         | 76.8        | 41.8        | 12          | 0.4         | 48.3        |
