# Supplementary material for: Amino acid variants of SARS-CoV-2 papain-like protease have impact on drug binding
Source: PubMed Central journal article supplement (PMC9721480; doi:10.1371/journal.pcbi.1010667), 2022-11-21
Supplement: pcbi.1010667.s010.pdf [file pcbi.1010667.s010.pdf]

**S3 Table: Hydrophobic interactions between GRL-0617 ligand rings and protein amino acids.** Crystal – data for PDB ID: 7jrn with information on distance between rings. For trajectories – percentage of trajectory in which interaction occurs (i.e.  $D < 5\text{\AA}$ ; based on frames every 100ps). Trajectories in which the ligand dissociated from the protein are indicated with \*. A1, A2 – naphthyl group; B – 4-methylbenzenamine moiety.

|                | A1-<br>-P247 | A1-<br>-P248     | A1-<br>-Y264 | A1-<br>-Y268 | A2-<br>-P247 | A2-<br>-P248     | A2-<br>-Y264 | A2-<br>-Y268     | B-<br>-Y264 | B-<br>-Y268 | B-<br>-Q269 |
|----------------|--------------|------------------|--------------|--------------|--------------|------------------|--------------|------------------|-------------|-------------|-------------|
| Crystal        | -            | 4.5 $\text{\AA}$ | -            | -            | -            | 5.0 $\text{\AA}$ | -            | 5.0 $\text{\AA}$ | -           | -           | -           |
| WT:1           | 0.1          | 82.2             | 0.2          | 8            | 4.4          | 61               | 0            | 22.6             | 0           | 5.5         | -           |
| WT:2           | 0.2          | 81.4             | 0.3          | 8.4          | 4.2          | 63               | 0            | 24.6             | 0           | 6.7         | -           |
| G163S:1        | 0.1          | 81.1             | 0.1          | 7.7          | 2            | 62.3             | 0            | 21.2             | 0           | 7.6         | -           |
| A246V:1        | 0            | 86.5             | 0.1          | 5.4          | 2.5          | 54.7             | 0            | 31.6             | 0           | 6.6         | -           |
| P247S:1        | -            | 78.9             | 0.3          | 7.6          | -            | 62.7             | 0            | 22.6             | 0           | 6.5         | -           |
| P247S:2        | -            | 80.8             | 0.1          | 7.5          | -            | 63.1             | 0            | 20.7             | 0           | 6.5         | -           |
| P247Q:1        | -            | 77.1             | 0.2          | 7.6          | -            | 56.5             | 0            | 24               | 0           | 6.1         | -           |
| P247Q:2        | -            | 80.3             | 0.6          | 7.5          | -            | 65.5             | 0            | 29.9             | 0           | 6           | -           |
| P248S:1        | 0.4          | -                | 0.2          | 5.11         | 0.9          | -                | 0            | 44.8             | 0           | 4.5         | -           |
| P248S:2        | 0.2          | -                | 0.2          | 2.4          | 1.7          | -                | 0            | 40.1             | 0           | 3.8         | -           |
| P248S:3        | 0.1          | -                | 0.1          | 1.9          | 0.4          | -                | 0            | 41.2             | 0           | 4.3         | -           |
| E263D-Y264H:1* | 0.1          | 74.4             | 1.1          | 10.9         | 12.8         | 66.5             | 0            | 43.8             | 0           | 9.7         | -           |
| E263D-Y264H:2* | 0.1          | 74.5             | 4.1          | 15.1         | 7.5          | 73.1             | 0            | 40.7             | 0           | 8.4         | -           |
| Y264H:1*       | 0.8          | 73.2             | 0.5          | 13.9         | 3            | 41.2             | 0            | 53.4             | 0           | 4.1         | -           |
| Y264H:2        | 0.1          | 63.7             | 2            | 9            | 1.5          | 43               | 0            | 46               | 0           | 8.5         | -           |
| Y264H:3        | 0.3          | 81.6             | 1.2          | 15.6         | 11.4         | 62.3             | 0            | 53.6             | 0           | 5.6         | -           |
| Y264H:4        | 0.1          | 73.3             | 3.5          | 9.2          | 3.5          | 56.8             | 0            | 45.1             | 0           | 9           | -           |
| T265A-Y268C:1* | 0.3          | 64               | 1.7          | 70.5         | 3            | 53.6             | 0            | 47.5             | 0           | 35.7        | -           |
| T265A-Y268C:2  | 0.1          | 70.8             | 4.2          | 83.1         | 3.4          | 48.4             | 0            | 74               | 0           | 37.5        | -           |
| T265A-Y268C:3  | 0.4          | 68.3             | 1.8          | 76.6         | 2.3          | 55.6             | 0            | 58               | 0           | 29.8        | -           |
| N267D:1        | 0            | 80               | 0            | 6.7          | 1.9          | 62.3             | 0            | 20.2             | 0           | 6.5         | -           |
| Q269R:1        | 0            | 79               | 0.2          | 7.8          | 2.5          | 55               | 0            | 24.7             | 0           | 5.2         | 43.6        |
| Q269R:2        | 0.1          | 79.4             | 0.1          | 6            | 1.5          | 53.5             | 0            | 24.8             | 0           | 5.6         | 44.9        |
